# Supplementary material for: Correct dosing, adherence and persistence of DOACs in atrial fibrillation and chronic kidney disease: a systematic review and meta-analysis
Source: PubMed Central journal article supplement — Open Heart. 2023 Jul 7;10(2):e002340. doi: 10.1136/openhrt-2023-002340 (PMC10347456; doi:10.1136/openhrt-2023-002340), 2023-07-07
Supplement: openhrt-2023-002340supp002.pdf [file openhrt-2023-002340supp002.pdf]

**Supplementary Table 2 - RoB Table of studies involved in meta-analysis.**

|                           | NOS assessment |                   |               | Sub total assessment  |              |                | Conclusion |
|---------------------------|----------------|-------------------|---------------|-----------------------|--------------|----------------|------------|
| Study                     | Selection (S)  | Comparability (C) | Outcome (E/O) | S+ (Good, fair, poor) | C (G,F or P) | E/O (G,F or P) | G, F, P    |
| 1.Shore et al (2014)      | ***            | *                 | ***           | Good                  | Fair         | Good           | Good       |
| 2.Banerjee et al (2019)   | ***            | **                | ***           | Good                  | Good         | Good           | Good       |
| 3.Leef et al (2019)       | ***            | *                 | ***           | Good                  | Fair         | Good           | Good       |
| 4.Briasoulis et al (2020) | ***            | *                 | ***           | Good                  | Fair         | Good           | Good       |
| 5.Erdogan et al (2021)    | ***            | **                | ***           | Good                  | Fair         | Good           | Good       |
| 6.Jackson et al (2021)    | ***            | *                 | ***           | Good                  | Fair         | Good           | Good       |
| 7.Ting et al (2013)       | ***            | *                 | ***           | Good                  | Fair         | Good           | Good       |
