# Supplementary figures and images for: Correct dosing, adherence and persistence of DOACs in atrial fibrillation and chronic kidney disease: a systematic review and meta-analysis
Source: PubMed Central journal article supplement — Open Heart. 2023 Jul 7;10(2):e002340. doi: 10.1136/openhrt-2023-002340 (PMC10347456; doi:10.1136/openhrt-2023-002340), 2023-07-07

**Supplementary Figure 1 Funnel Plot of included studies.**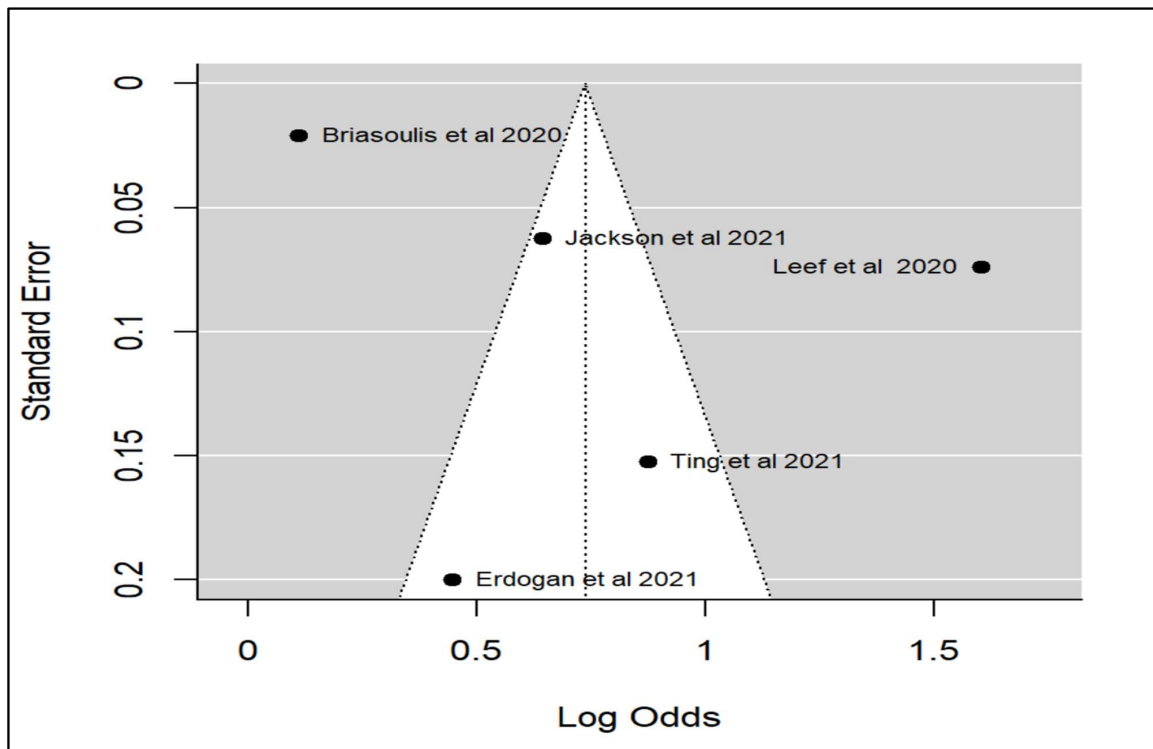

Supplement: openhrt-2023-002340supp003.pdf [file openhrt-2023-002340supp003.pdf]
